# Supplementary material
Source: publisher figshare collection journal article supplement (https://diabetesjournals.figshare.com/articles/dataset/_/14770662)
Supplement: Supplementary file 1 [file 1]

**Supplementary Figure 1. Tracheal secretion from COVID-19 patients with DM trends toward increased expression of ALOX5 and ACE2/TMPRSS2 viral receptors.** Relative expression of ACE2 (A), TMPRSS2 (B) and ALOX5 (C) in tracheal secretion of NDM and DM patients with COVID-19. Dotted line = control group relative expression. Data shown as median.

**Supplementary Figure 2. No correlation between ACE2 and ALOX5 is observed in NDM COVID-19 patients.** Correlation between the expression of ALOX5 and ACE2 in PBMCs of NDM individuals with COVID-19 (A). Spearman r correlation.

**Supplementary Figure 3. No difference in IL-1 $\beta$  production between NDM and DM groups of patients with COVID-19.** IL- $\beta$  serum levels in NDM and DM individuals with COVID-19. Dotted line = cut-off for detection limit. Data shown as median.

**Supplementary Figure 4. LTB<sub>4</sub> is the most prevalent inflammatory mediator at systemic levels.** Global and individualized view of LTB<sub>4</sub> (red), IL-6 (green) and TNF- $\alpha$  (blue) production in NDM (A) and DM (B) individuals with COVID-19 through Cubic spline analysis.

**Supplementary Figure 5. O<sub>2</sub> saturation levels are reduced in DM patients with COVID-19 compared with NDM individuals.** SpO<sub>2</sub> in NDM and DM patients with COVID-19. Data shown as median. \* p<0.05.

**Supplementary Figure 6. Correlation between inflammatory mediators and clinical parameters of NDM and DM individuals with COVID-19.** Correlation between ALOX5 and LTB<sub>4</sub> (A), PaO<sub>2</sub>/FiO<sub>2</sub> and SpO<sub>2</sub>/FiO<sub>2</sub> (B), disease duration and hospitalization days (C), IL-6 and hospitalization days (D), TNF- $\alpha$  and LTB<sub>4</sub> (E) in NDM and DM patients with COVID-19. Dotted lines = median of NDM group. Spearman r correlation. \* p<0.05. \*\*\*\* p<0.0001.

**Supplementary Figure 7. Liver enzymes are altered in DM patients with COVID-19 compared to NDM group.** Quantification of Leucogram (A), platelets (B), C-reactive protein (C), Lactate dehydrogenase (D), Glutamic-oxalacetic Transaminase (E), Glutamic

Pyruvic Transaminase (F), Gamma-glutamyl transferase (G), Alkaline phosphatase (H), Lactate (I), Urea (J) and Creatinine (K) in NDM and DM patients with COVID-19. Data shown in median. \*  $p < 0.05$ .
