# Supplementary material
Source: publisher figshare collection journal article supplement (https://diabetesjournals.figshare.com/articles/dataset/_/14770662)
Supplement: Supplementary file 2 [file 1]

| <b>Supplementary Table 1. Pathways found on the basis of DEGs between NDM and DM</b>  |
|---------------------------------------------------------------------------------------|
| 3-oxo-10R-octadecatrienoate beta-oxidation                                            |
| Aminosugars metabolism                                                                |
| Androgen and estrogen biosynthesis and metabolism                                     |
| Arachidonic acid metabolism                                                           |
| Bile acid biosynthesis                                                                |
| Biopterin metabolism                                                                  |
| Butanoate metabolism                                                                  |
| C21-steroid hormone biosynthesis and metabolism                                       |
| De novo fatty acid biosynthesis                                                       |
| Dimethyl-branched-chain fatty acid mitochondrial beta-oxidation                       |
| Di-unsaturated fatty acid beta-oxidation                                              |
| Endohydrolysis of 1,4-alpha-D-glucosidic linkages in polysaccharides by alpha-amylase |
| Fructose and mannose metabolism                                                       |
| Galactose metabolism                                                                  |
| Glycerophospholipid metabolism                                                        |
| Glycine, serine, alanine and threonine metabolism                                     |
| Glycolysis and Gluconeogenesis                                                        |
| Glycosphingolipid biosynthesis - ganglioseries                                        |
| Glycosphingolipid biosynthesis - globoseries                                          |
| Glycosphingolipid biosynthesis - neolactoseries                                       |
| Glycosphingolipid metabolism                                                          |
| Glycosylphosphatidylinositol(GPI)-anchor biosynthesis                                 |
| Histidine metabolism                                                                  |
| Leukotriene metabolism                                                                |
| Linoleate metabolism                                                                  |
| Lysine metabolism                                                                     |
| Methionine and cysteine metabolism                                                    |
| Mono-unsaturated fatty acid beta-oxidation                                            |
| N-Glycan biosynthesis                                                                 |
| O-Glycan biosynthesis                                                                 |
| Omega-3 fatty acid metabolism                                                         |
| Omega-6 fatty acid metabolism                                                         |
| Pentose phosphate pathway                                                             |
| Phosphatidylinositol phosphate metabolism                                             |

|                                                                                     |
|-------------------------------------------------------------------------------------|
| Phytanic acid peroxisomal oxidation                                                 |
| Porphyrin metabolism                                                                |
| Propanoate metabolism                                                               |
| Prostaglandin formation from arachidonate                                           |
| Prostaglandin formation from dihomo gama-linoleic acid                              |
| Proteoglycan biosynthesis                                                           |
| Purine metabolism                                                                   |
| Putative anti-Inflammatory metabolites formation from EPA                           |
| Pyrimidine metabolism                                                               |
| Saturated fatty acids beta-oxidation                                                |
| Selenoamino acid metabolism                                                         |
| Squalene and cholesterol biosynthesis                                               |
| TCA cycle                                                                           |
| Trihydroxycoprostanoyl-CoA beta-oxidation                                           |
| Tryptophan metabolism                                                               |
| Tyrosine metabolism                                                                 |
| Urea cycle and metabolism of arginine, proline, glutamate, aspartate and asparagine |
| Valine, leucine and isoleucine degradation                                          |
| Vitamin A (retinol) metabolism                                                      |
| Vitamin B2 (riboflavin) metabolism                                                  |
| Vitamin B3 (nicotinate and nicotinamide) metabolism                                 |
| Vitamin B5 - CoA biosynthesis from pantothenate                                     |
| Vitamin B6 (pyridoxine) metabolism                                                  |
| Vitamin B9 (folate) metabolism                                                      |
| Vitamin E metabolism                                                                |
| Vitamin K metabolism                                                                |
| Xenobiotics metabolism                                                              |
